# Supplementary material for: A pilot study on protocol consistency and graph metric reproducibility in microstructure-weighted connectomes
Source: Springer Nature journal article supplement (doi:10.1038/s41598-026-38964-z), 2026-02-11
Supplement: MOESM1 [file 41598_2026_38964_MOESM1_ESM.pdf]

# A pilot study on protocol consistency and graph metric reproducibility in microstructure-weighted connectomes

Maddalena Cavallo<sup>1, 2</sup>, Mattia Ricchi<sup>2, 3, 4</sup>, Aaron Axford<sup>2</sup>, Kylie Yeung<sup>2, 5, 6</sup>, Jordan McGing<sup>2</sup>, Leonardo Brizi<sup>1, 4</sup>, Damian J. Tyler<sup>2, 7</sup>, Claudia Testa<sup>1, 4, +</sup>, and James T. Grist<sup>2, 6, +, \*</sup>

<sup>1</sup>Department of Physics and Astronomy, University of Bologna, Bologna, Italy

<sup>2</sup>Oxford Centre for Clinical Magnetic Resonance Research, University of Oxford, Oxford, UK

<sup>3</sup>Department of Computer Science, University of Pisa, Pisa, Italy

<sup>4</sup>National Institute of Nuclear Physics (INFN), Division of Bologna, Bologna, Italy

<sup>5</sup>Department of Oncology, University of Oxford, Oxford, UK

<sup>6</sup>Department of Radiology, Oxford University Hospitals NHS Trust, Oxford, UK

<sup>7</sup>Department of Physiology, Anatomy, and Genetics, University of Oxford, Oxford, UK

\*james.grist@cardiov.ox.ac.uk

+these authors contributed equally to this work

## SUPPLEMENTARY MATERIAL

### Intraclass correlation coefficients

|                 | FA   | MD   | INVF | ICVF  | $\beta$ | ODI  |
|-----------------|------|------|------|-------|---------|------|
| Corpus callosum | 0.90 | 0.62 | –    | –     | –       | –    |
| Genu C.C.       | –    | –    | 0.96 | 0.79  | 0.96    | 0.79 |
| Splenium C.C.   | –    | –    | 0.95 | -0.05 | 0.91    | 0.86 |
| Ant. limb I.C.  | –    | –    | 0.80 | 0.02  | 0.97    | 1.00 |
| Post. limb I.C. | –    | –    | 0.70 | 0.12  | 0.92    | 0.89 |
| Thalamus        | 0.64 | 0.65 | 0.35 | 0.86  | 0.82    | 0.96 |
| Caudate         | –    | –    | 0.49 | 0.97  | 0.35    | 0.79 |
| Putamen         | –    | –    | 0.44 | 0.20  | 0.90    | 0.85 |
| Ventricles      | 0.88 | 0.96 | –    | –     | –       | –    |

**Table S1.** Inter-site intraclass correlation coefficients of DTI and NODDI parameters in *in vivo* ROIs. FA: fractional anisotropy, MD: mean diffusivity, INVF: intra-neurite volume fraction, ICVF: intra-cellular volume fraction,  $\beta$ : concentration parameter, ODI: orientation dispersion index, C.C.: corpus callosum, I.C.: internal capsule.

## Bland-Altman analysis

|         |           | Genu C.C. | Splenium C.C. | Ant. limb I.C. | Post. limb I.C. | Thalamus | Caudate | Putamen |
|---------|-----------|-----------|---------------|----------------|-----------------|----------|---------|---------|
| INVf    | BA bias   | -0.0035   | -0.0041       | 0.0007         | -0.0116         | 0.0075   | 0.0079  | 0.0040  |
|         | Lower LoA | -0.0255   | -0.0277       | -0.0130        | -0.0142         | 0.0018   | -0.0061 | -0.0133 |
|         | Upper LoA | 0.0185    | 0.0194        | 0.0144         | -0.0090         | 0.0132   | 0.0218  | 0.0212  |
| ICVF    | BA bias   | 0.0085    | 0.0062        | -0.0026        | 0.0089          | -0.0011  | 0.0049  | 0.0003  |
|         | Lower LoA | -0.0183   | -0.0006       | -0.0164        | -0.0064         | -0.0039  | -0.0142 | -0.0011 |
|         | Upper LoA | 0.0353    | 0.0129        | 0.0111         | 0.0241          | 0.0017   | 0.0241  | 0.0017  |
| $\beta$ | BA bias   | -0.0137   | 0.0032        | 0.0247         | 0.0322          | 0.0013   | 0.0173  | 0.0254  |
|         | Lower LoA | -0.0539   | -0.0303       | -0.0033        | -0.0124         | -0.0179  | -0.0251 | 0.0051  |
|         | Upper LoA | 0.0265    | 0.0367        | 0.0526         | 0.0768          | 0.0205   | 0.0596  | 0.0457  |
| ODI     | BA bias   | -0.0012   | 0.0002        | -0.0055        | -0.0061         | -0.0027  | -0.0102 | -0.0051 |
|         | Lower LoA | -0.0091   | -0.0024       | -0.0115        | -0.0179         | -0.0057  | -0.0194 | -0.0131 |
|         | Upper LoA | 0.0068    | 0.0027        | 0.0006         | 0.0056          | 0.0002   | -0.0010 | 0.0028  |

**Table S2.** Bland-Altman analysis of Bingham-NODDI parameters for multi-shell protocol comparison from Site 1. INVf: intra-neurite volume fraction, ICVF: intra-cellular volume fraction,  $\beta$ : concentration parameter, ODI: orientation dispersion index, C.C.: corpus callosum, I.C.: internal capsule, LoA: limits of agreement.

|         |           | Genu C.C. | Splenium C.C. | Ant. limb I.C. | Post. limb I.C. | Thalamus | Caudate | Putamen  |
|---------|-----------|-----------|---------------|----------------|-----------------|----------|---------|----------|
| INVf    | BA bias   | 0.0079    | -0.0001       | 0.0016         | -0.0114         | 0.0077   | 0.0075  | 0.0080   |
|         | Lower LoA | -0.0011   | -0.0114       | -0.0036        | -0.0240         | 0.0032   | 0.0026  | 0.0055   |
|         | Upper LoA | 0.0169    | 0.0113        | 0.0069         | 0.0012          | 0.0121   | 0.0124  | 0.0105   |
| ICVF    | BA bias   | -0.0014   | 0.0075        | -0.0011        | 0.0075          | 0.0010   | 0.0013  | 0.00004  |
|         | Lower LoA | -0.0162   | -0.0079       | -0.0064        | -0.0056         | -0.0049  | -0.0080 | -0.00016 |
|         | Upper LoA | 0.0135    | 0.0229        | 0.0041         | 0.0205          | 0.0069   | 0.0106  | 0.00024  |
| $\beta$ | BA bias   | 0.0015    | -0.0069       | 0.0217         | 0.0322          | 0.0027   | 0.0097  | 0.0187   |
|         | Lower LoA | -0.0309   | -0.0298       | -0.0087        | 0.0077          | -0.0122  | -0.0686 | -0.0108  |
|         | Upper LoA | 0.0340    | 0.0161        | 0.0521         | 0.0567          | 0.0177   | 0.0880  | 0.0483   |
| ODI     | BA bias   | -0.0042   | -0.0028       | -0.0039        | -0.0071         | -0.0032  | -0.0111 | -0.0022  |
|         | Lower LoA | -0.0071   | -0.0062       | -0.0093        | -0.0137         | -0.0081  | -0.0243 | -0.0251  |
|         | Upper LoA | -0.0013   | 0.0007        | 0.0016         | -0.0005         | 0.0017   | 0.0022  | 0.0207   |

**Table S3.** Bland-Altman analysis of Bingham-NODDI parameters for multi-shell protocol comparison from Site 2. INVf: intra-neurite volume fraction, ICVF: intra-cellular volume fraction,  $\beta$ : concentration parameter, ODI: orientation dispersion index, C.C.: corpus callosum, I.C.: internal capsule, LoA: limits of agreement.
